# Supplementary material for: The relative orientation of the lipid and carbohydrate moieties of lipochitooligosaccharides related to nodulation factors depends on lipid chain saturation
Source: Royal Society of Chemistry journal article supplement (doi:10.1039/b500104h), 2005-01-01

### Supplementary data

Figure 1S. Superimposition of 50 characteristic conformations of **1** and **2**. The four residues of the sugar moiety are shown in different colors (blue, yellow, rose, green), the lipid chain is colored gray. The oxygen atoms of the sulfate group are displayed in red. Panel A. Conformations of **1**. Panel B. Conformations of **2**.

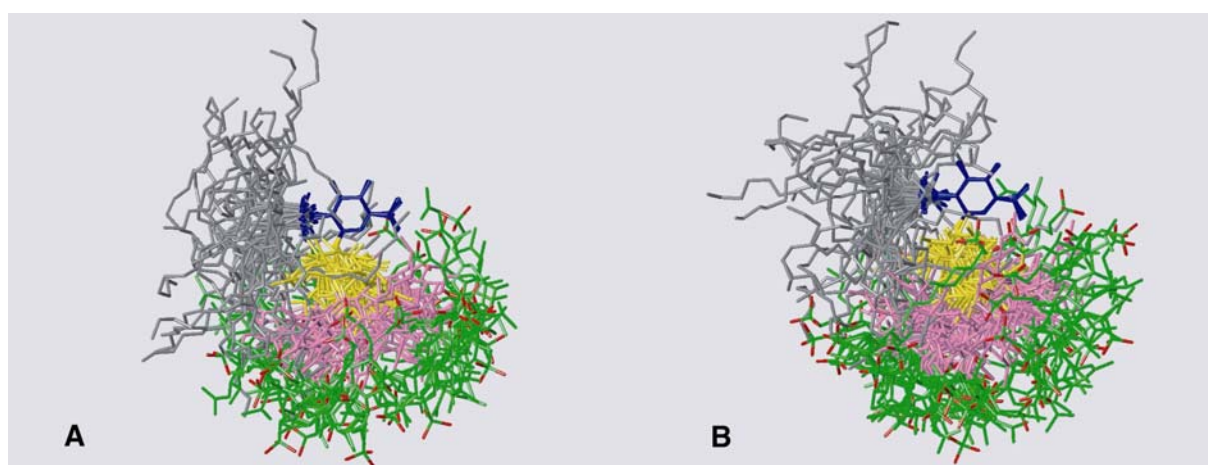

Supplement: b500104h.pdf [file b500104h.pdf]
